# Supplementary material for: Cross-kingdom patterns of alternative splicing and splice recognition
Source: PubMed Central journal article supplement (PMC2397502; doi:10.1186/gb-2008-9-3-r50), 2008-03-05

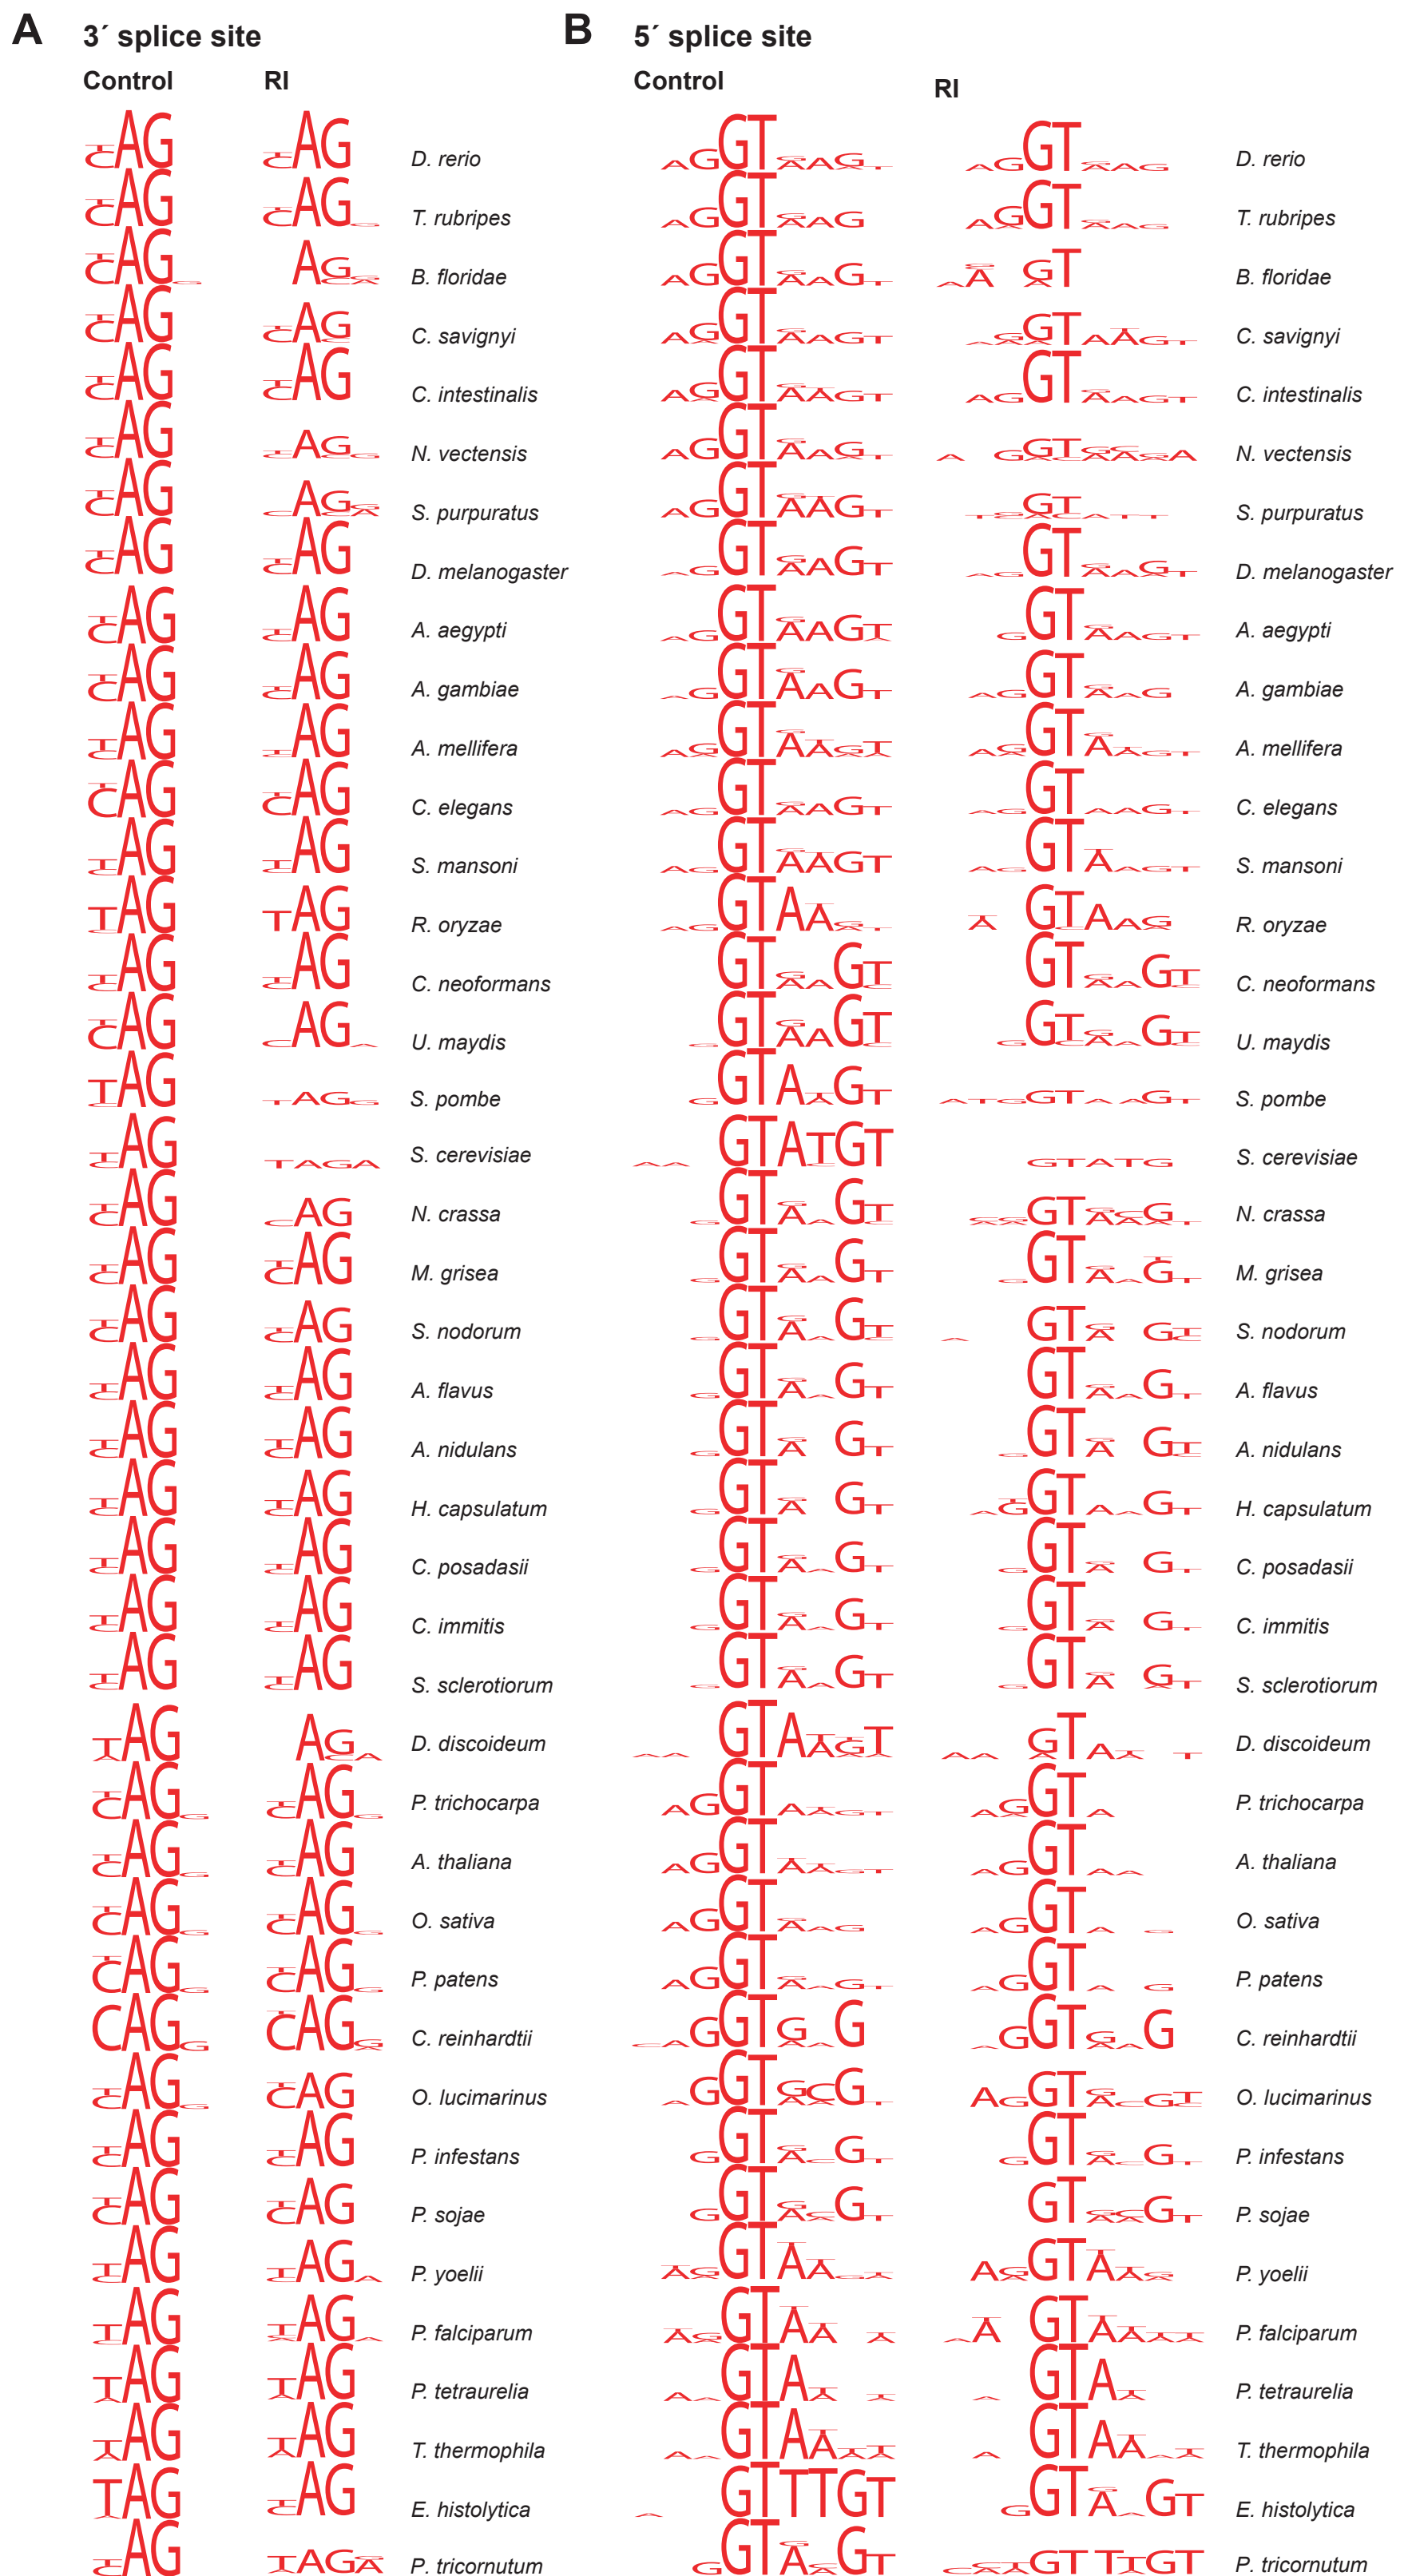

Supplement: gb-2008-9-3-r50-S2.pdf [file gb-2008-9-3-r50-S2.pdf]
